# Supplementary material for: Pillar[5]arene derivatives containing two dinitrophenyl rings: syntheses, conformations and the tubular self assembly in the solid state
Source: Royal Society of Chemistry journal article supplement (doi:10.1039/c5ra28117b), 2016-01-01
Supplement: c5ra28117b1.pdf [file c5ra28117b1.pdf]

**Pillar[5]arene derivatives containing two dinitrophenyl rings:  
Syntheses, conformations and the tubular self assembly in the solid  
state**

Min Xue,\* Xiaoyan Xu, Jianggen An, Jie Wang, Yong Yang, Yongsong Liu\*

*School of Science, Zhejiang Sci-Tech University, Hangzhou 310018, P. R. China*

*Tel: +86-571-8684-3754; Email address: [minxue@zstu.edu.cn](mailto:minxue@zstu.edu.cn), [yongsongliu@zstu.edu.cn](mailto:yongsongliu@zstu.edu.cn)*

**Electronic Supplementary Information**

|                                         |           |
|-----------------------------------------|-----------|
| 1. <i>Materials and Methods</i>         | <i>S2</i> |
| 2. <i>Synthesis of 1</i>                | <i>S2</i> |
| 3. <i>Synthesis of 2</i>                | <i>S4</i> |
| 4. <i>X-ray crystal data of 1 and 2</i> | <i>S5</i> |
| 5. <i>Crystal structure of 1</i>        | <i>S6</i> |
| <i>References</i>                       | <i>S7</i> |

### 1. Materials and Methods:

**DMP[4]A[1]HQ** was synthesized according to literature procedures.<sup>S1</sup> All reagents were commercially available and used as supplied without further purification. Solvents were either employed as purchased or dried according to procedures described in the literature. NMR spectra were recorded with a Bruker Avance II DMX 400 spectrophotometer with use of the deuterated solvent as the lock and TMS as the internal reference. Low-resolution electrospray ionization (LRESI) mass spectra were obtained on a Bruker Esquire 3000 plus mass spectrometer (Bruker-Franzen Analytik GmbH Bremen, Germany) equipped with an ESI interface and an ion trap analyzer. High-resolution mass spectrometry experiments were performed with a Bruker Daltonics Apex III spectrometer or with a Bruker 7-Tesla FT-ICR mass spectrometer equipped with an electrospray source (Billerica, MA, USA). The melting points were collected on a SHPSIC WRS-2 automatic melting point apparatus.

### 2. Synthesis of **1**

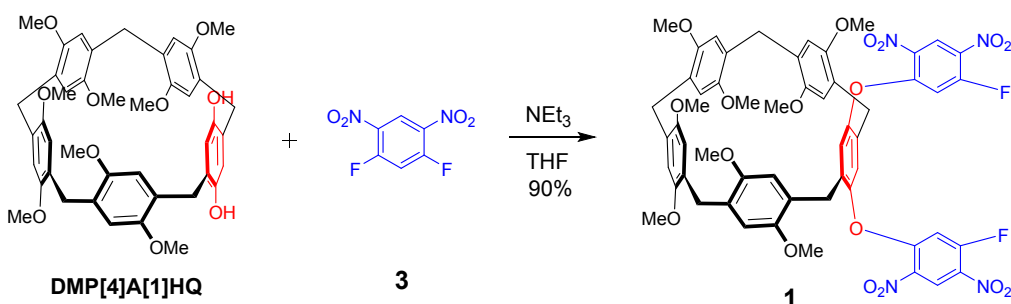

**Scheme S1.** Synthesis of **1**.

To a solution of 1,5-difluoro-2,4-dinitrobenzene **3** (0.174 g, 0.855 mmol) in THF (20 mL) was added dropwise a mixture of **DMP[4]A[1]HQ** (0.206 g, 0.285 mmol) and NEt<sub>3</sub> (0.0870 g, 0.855 mmol) in THF (10 mL). The reaction mixture was stirred for 10 h under nitrogen atmosphere, and then concentrated and chromatographed on a silica gel column to give pure **1** (90%) as a yellow solid.

**1** M.p. 153.2-153.5 °C. The <sup>1</sup>H NMR spectrum of **1** is shown in Figure S1. <sup>1</sup>H NMR (400 MHz, CDCl<sub>3</sub>, room temperature)  $\delta$  (ppm): 3.40 (d,  $J = 5.32$  Hz, 2H, CH<sub>3</sub>), 3.48 (s, 6H, CH<sub>3</sub>), 3.60 (s, 6H, CH<sub>3</sub>), 3.65 (s, 2H, CH<sub>3</sub>), 3.74 (d,  $J = 17.89$  Hz, 8H, CH<sub>3</sub>), 3.77 (s, 8H, ArCH<sub>2</sub>), 3.82 (s, 1H, ArCH<sub>2</sub>), 3.85 (s, 1H, ArCH<sub>2</sub>), 6.35 (d,  $J = 11.52$  Hz, 2H, ArH), 6.60 (s, 2H, ArH), 6.74 (d,  $J = 11.80$  Hz, 4H, ArH), 6.93 (s, 2H, ArH),

7.21 (s, 2H, ArH), 8.90 (d,  $J = 7.40$  Hz, 2H, ArH). The  $^{13}\text{C}$  NMR spectrum of **1** is shown in Figure S2.  $^{13}\text{C}$  NMR (100 MHz,  $\text{CDCl}_3$ , room temperature)  $\delta$  (ppm): 28.0, 28.3, 28.5, 29.3, 48.1, 54.2, 54.4, 54.6, 4.7, 106.2, 106.4, 112.0, 112.2, 112.7, 112.9, 123.1, 123.6, 123.8, 126.5, 127.1, 127.6, 129.1, 129.4, 129.4, 133.1, 134.0, 147.3, 149.3, 149.4, 149.5, 149.7, 155.8, 156.0, 156.1, 158.6. MS (ESI):  $m/z$  calcd  $[\text{M}+\text{H}^+]$   $\text{C}_{55}\text{H}_{48}\text{F}_2\text{N}_4\text{O}_{18}\text{H}^+$ : 1091.3; Found: 1091.3. LRESIMS:  $m/z$  calcd. for  $[\text{M} + \text{Na}]^+$   $\text{C}_{55}\text{H}_{48}\text{F}_2\text{N}_4\text{O}_{18}\text{Na}$ , 1113.2829, found 1113.2806, error 2.1 ppm.

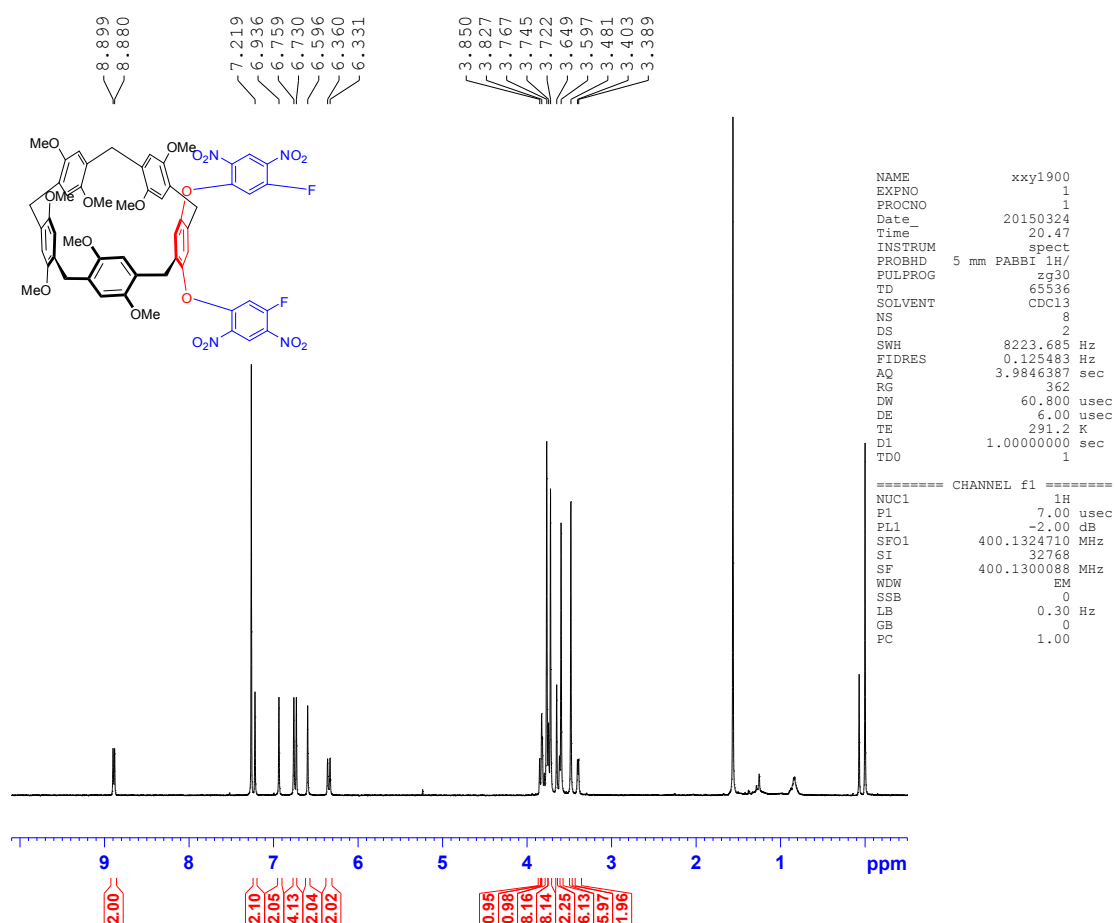

**Fig. S1.**  $^1\text{H}$  NMR spectrum (400 MHz,  $\text{CDCl}_3$ , room temperature) of **1**.





parameters, 78 restraints,  $F(000) = 2880$ ,  $R_1 = 0.0948$ ,  $wR_2 = 0.1596$  (all data),  $R_1 = 0.0603$ ,  $wR_2 = 0.1856$  [ $I > 2\sigma(I)$ ], max residual density  $0.376 \text{ e}\cdot\text{\AA}^{-3}$ , and goodness-of-fit ( $F^2$ ) = 1.034. CCDC number: 1444304.

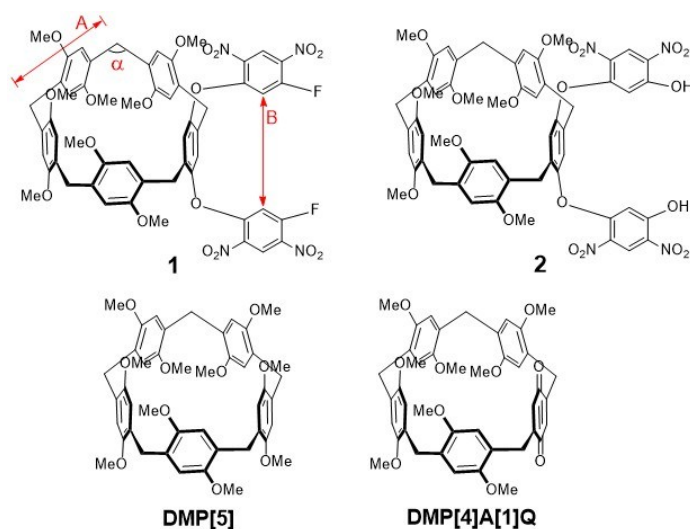

**Fig. S4.** Structures of **1**, **2**, **DMP[5]** and **DMP[4]A[1]Q** and the representation of *A*, *B* and  $\alpha$ .

Table S1. Crystal data of **1**, **2**, **DMP[5]** and **DMP[4]A[1]Q**

| Compounds   | A (Å) | $\alpha$ (°) | B (Å) |
|-------------|-------|--------------|-------|
| <b>1</b>    | 5.85  | 107.9        | 5.410 |
| <b>2</b>    | 5.85  | 107.8        | 5.461 |
| DMP[5]      | 5.84  | 107.9        | —     |
| DMP[4]A[1]Q | 5.85  | 107.9        | —     |

### 5. Crystal structure of **2**

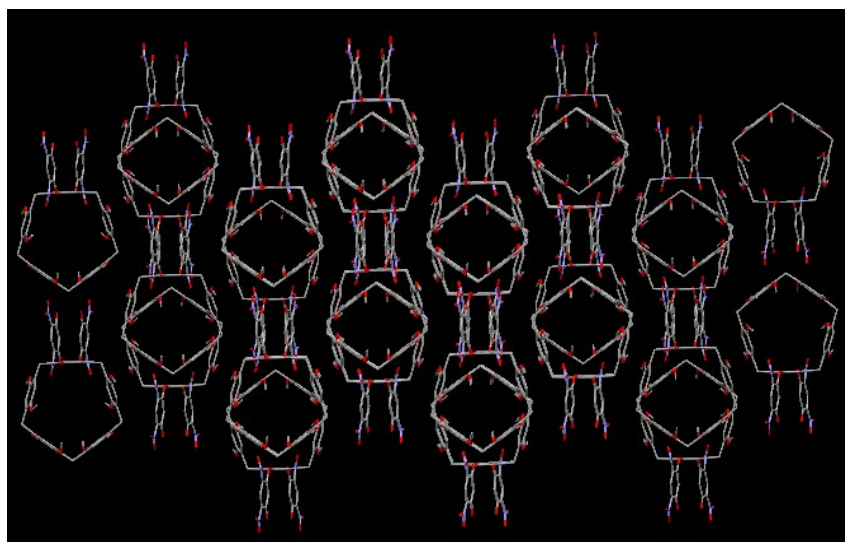

**Fig. S5.** Crystal packing of **2**. Solvent molecules and hydrogen atoms are omitted for clarity. C, black; H, white; O, red; N, blue.

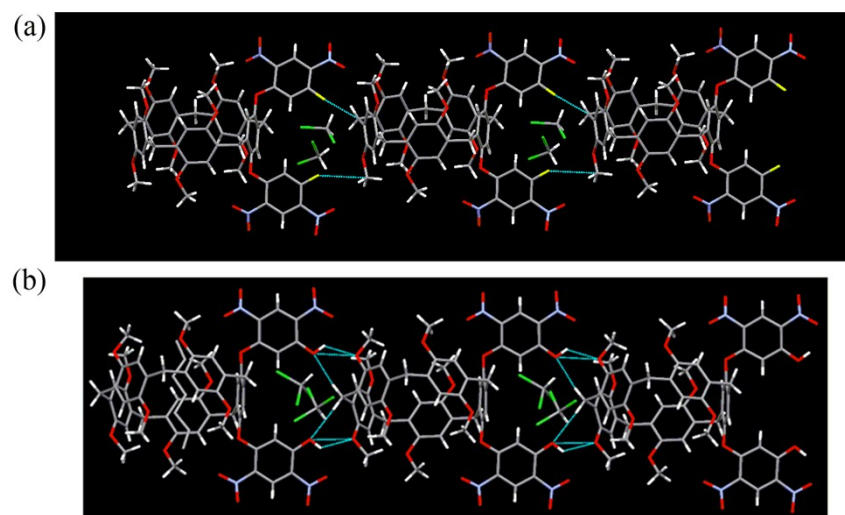

**Fig. S6.** Hydrogen bonds provided by F atoms in molecules **1** (a) and OH groups in molecules **2** (b) in the solid state.

*References:*

- S1. C. Xie, W. Hu, W. Hu, Y. A. Liu, J. Huo, J. Li, B. Jiang and K. Wen, *Chin. J. Chem.*, 2015, **33**, 379–383.
